# Supplementary material
Source: MDPI journal article supplement (https://www.mdpi.com/2227-9040/9/12/346)
Supplement: s1 [file s1]

# Macrocycle-Functionalized RGO for Gas Sensors for BTX Detection Using a Double Transduction Mode

Elisa Ruiz <sup>1</sup>, Thiaka Gueye <sup>1</sup>, Claire Masson <sup>2</sup>, Christelle Varenne <sup>1</sup>, Alain Pauly <sup>1</sup>, Jérôme Brunet <sup>1</sup> and Amadou L. Ndiaye <sup>3,\*</sup>

<sup>1</sup> Université Clermont Auvergne, Clermont Auvergne INP, CNRS, Institut Pascal, F-63000 Clermont-Ferrand, France; Elisa.RUIZ@uca.fr (E.R.); Thiaka.GUEYE@uca.fr (T.G.); Christelle.VARENNE@uca.fr (C.V.); alain.pauly@uca.fr (A.P.); jerome.brunet@uca.fr (J.B.)

<sup>2</sup> Université Clermont Auvergne, CNRS, SIGMA Clermont, ICCF, Clermont-Ferrand, F-63000, France  
claire.poncet@uca.fr

<sup>3</sup> Université Clermont Auvergne, CNRS, Institut Pascal, F-63000 Clermont-Ferrand, France

\* Correspondence: amadou.ndiaye@uca.fr; Tel.: 0033-473407238

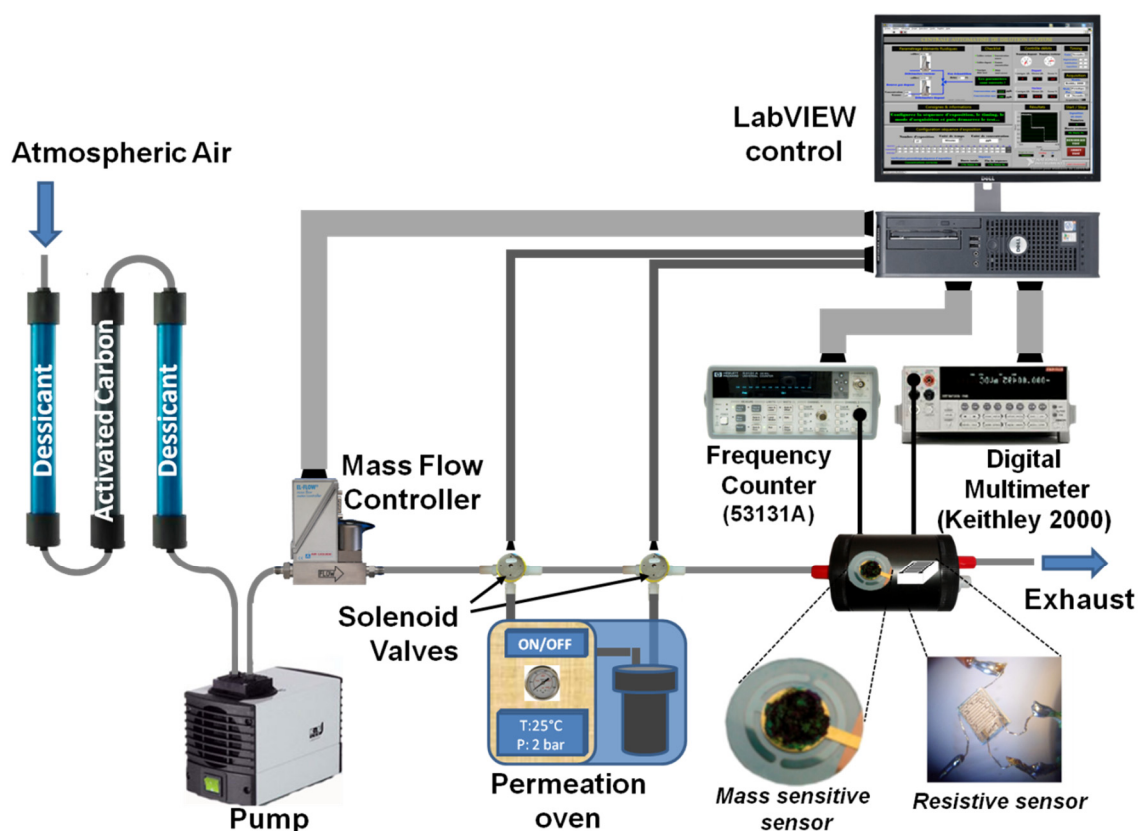

**Figure S1.** Experimental test bench used for the BTX sensing experiment.

For the concentration requirement the following formula is used:

$$\text{Concentration} = K \times P / F$$

K is the molar constant (depending on the molecular weight)

P is permeation rate given in (ng/min)

F is the diluents flow (cc/min)

For lower concentration range we put a permeation tube into the oven while for higher concentration range (>500ppm) we used diffusion tube.

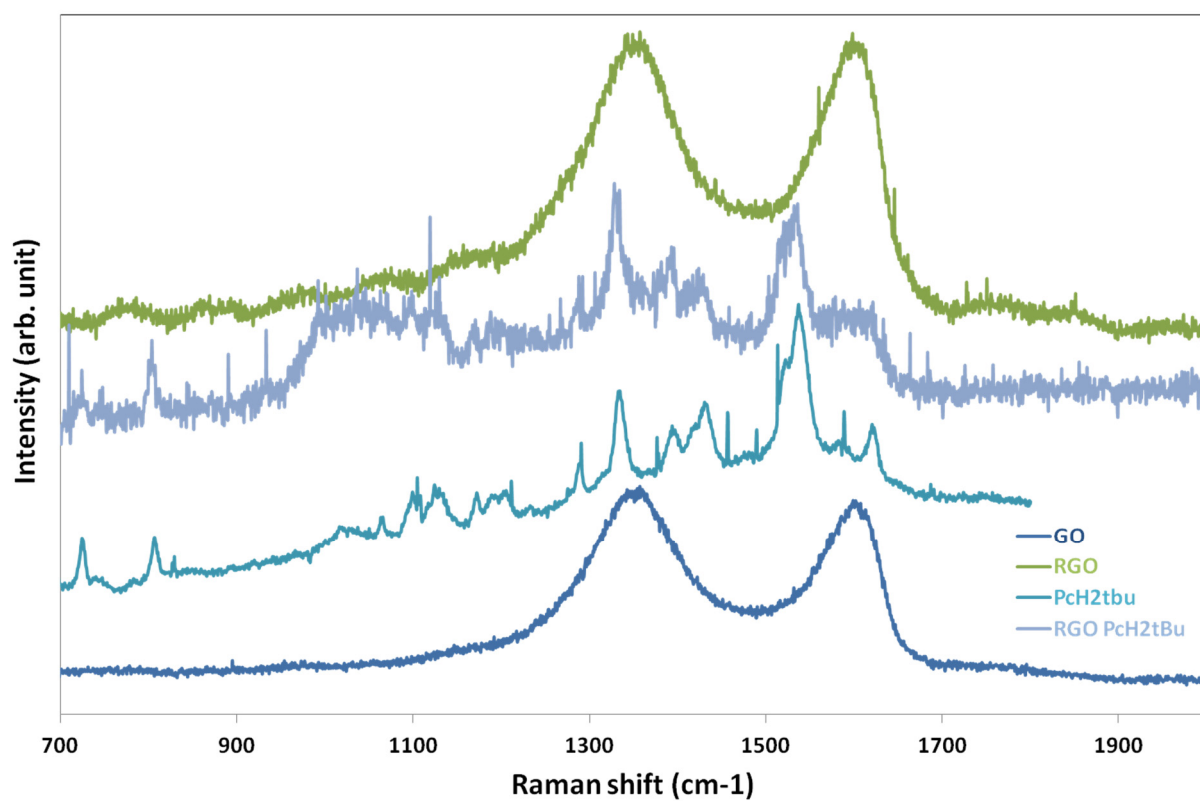

Figure S2. Raman spectra of GO, RGO, PcH2tBu and RGO/PcH2tBu.

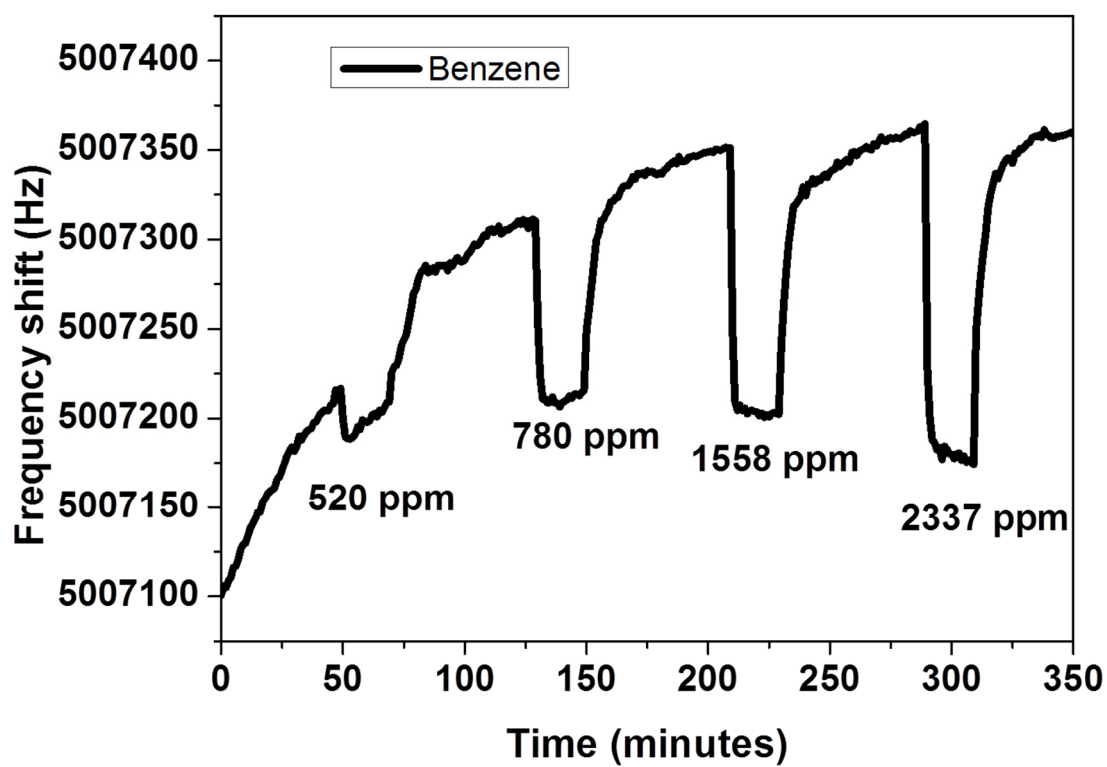

Figure S3. QCM sensor response RGO/PcH2tBu exposed to Benzene at a higher concentration.

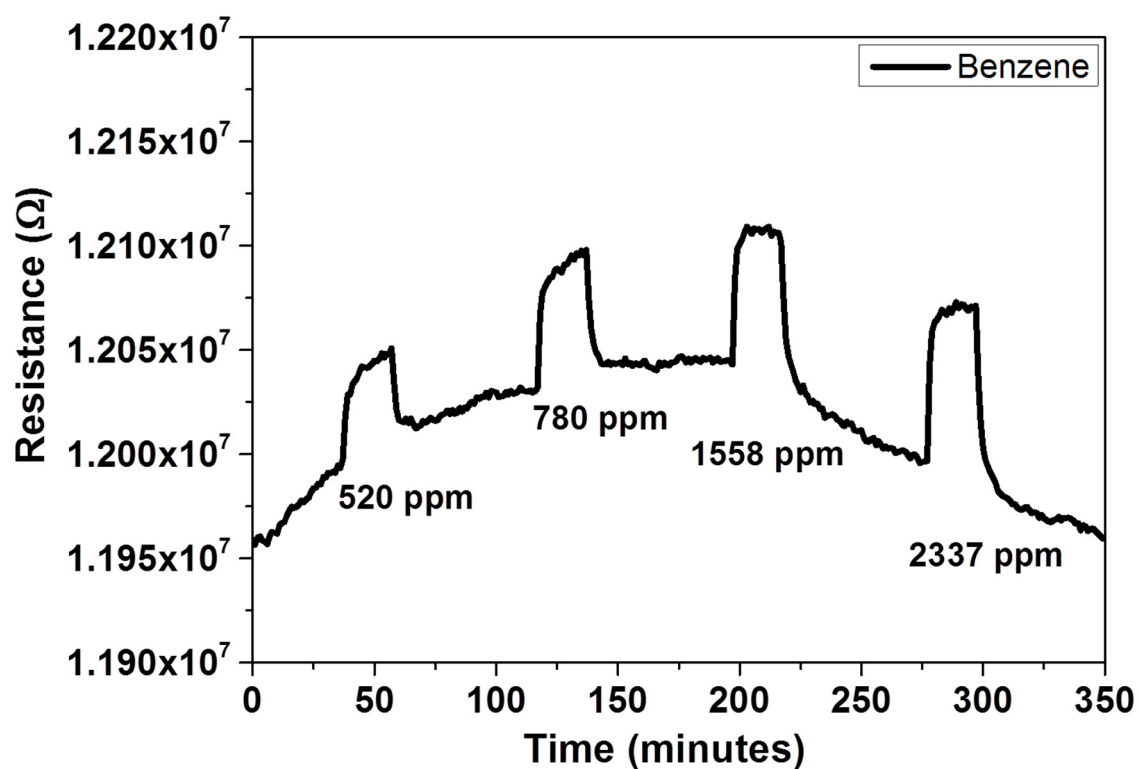

Figure S4. Resistive sensor response RGO/PcHtBu exposed to Benzene at a higher concentration.

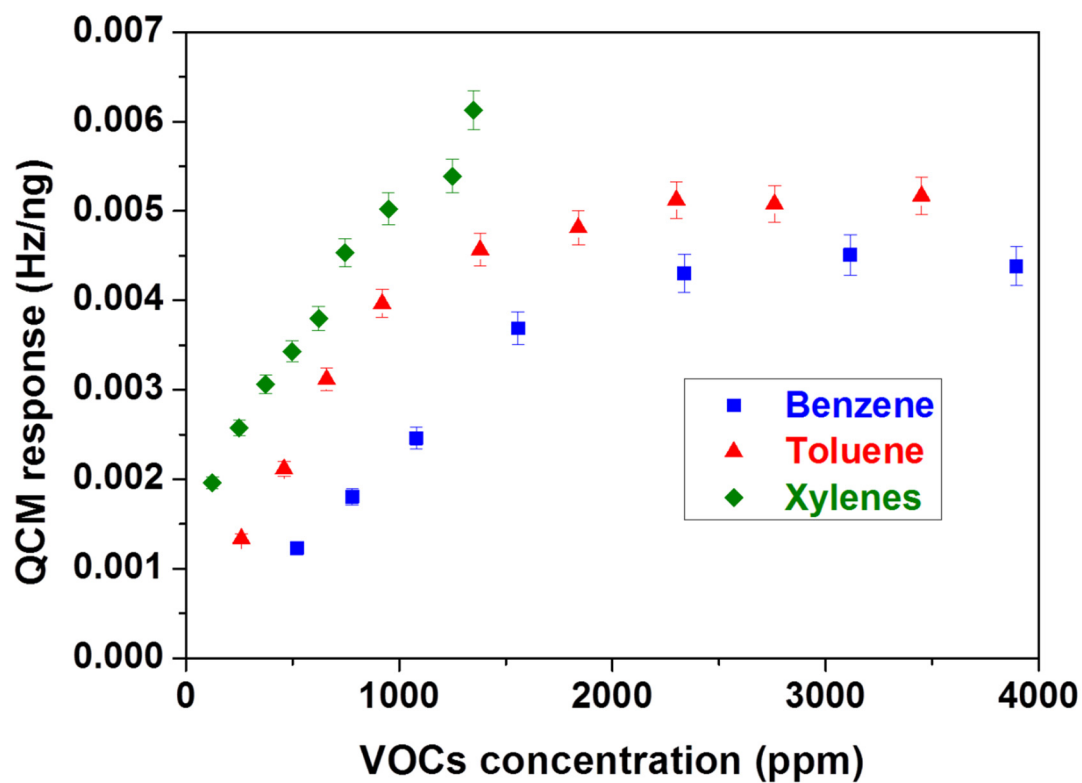

Figure S5. calibration curves corresponding to QCM sensor response of RGO/PcHtBu exposed to benzene, toluene and xylenes in the higher concentrations regimes.
